# Supplementary material for: Alternative Lengthening of Telomeres Is Rare in Canine Histiocytic Sarcoma
Source: MDPI journal article supplement (doi:10.3390/cancers15174214), 2023-08-22
Supplement: s1 [file s1]

Suppl Figure S1

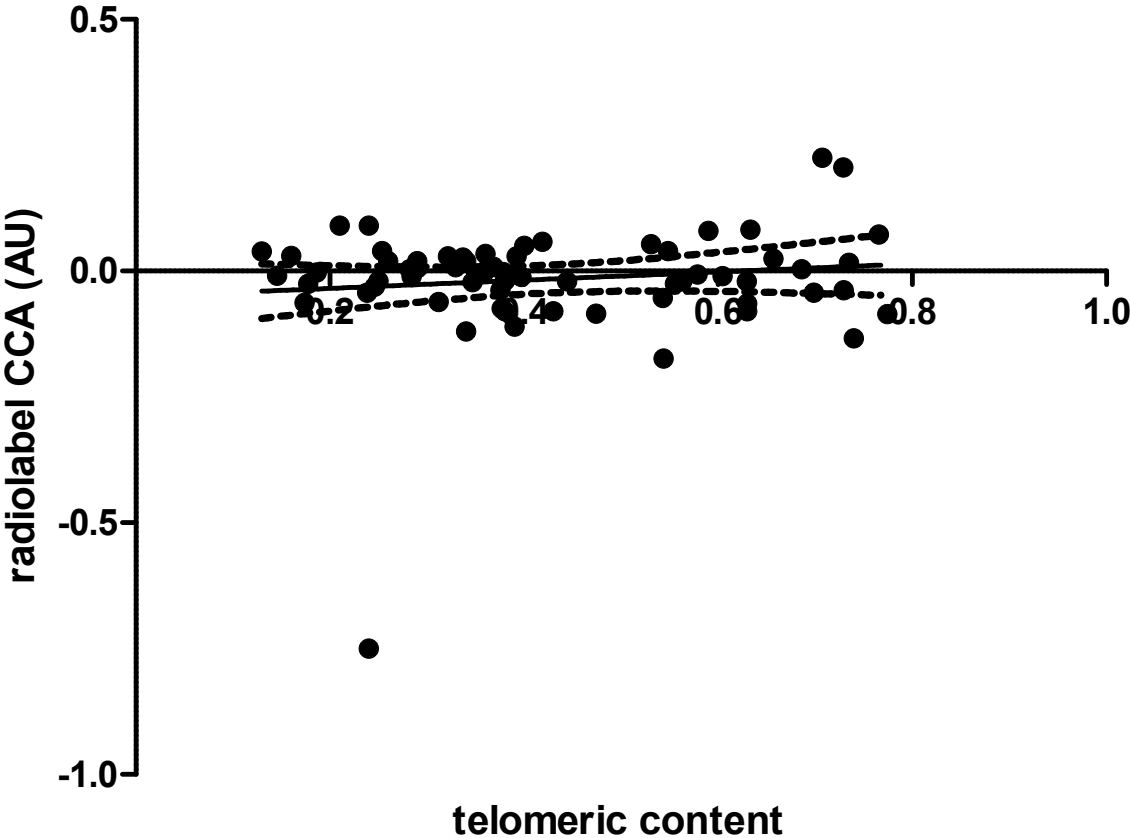

|                                              |                        |
|----------------------------------------------|------------------------|
| Number of XY Pairs                           | 66                     |
| Spearman r                                   | -0.05350               |
| 95% confidence interval                      | -0.2985 to 0.1981      |
| P value (two-tailed)                         | 0.6697                 |
| P value summary                              | ns                     |
| Exact or approximate P value?                | Gaussian Approximation |
| Is the correlation significant? (alpha=0.05) | No                     |
